# Supplementary material for: AK7-deficiency reversal inhibits ccRCC progression and boosts anti-PD1 immunotherapy sensitivity
Source: publisher site journal article supplement (doi:10.18632/aging.206006), 2024-07-05
Supplement: Supplementary file [file aging-v16-206006-supplementary-material-SD1.pdf]

**SUPPLEMENTARY FIGURES**

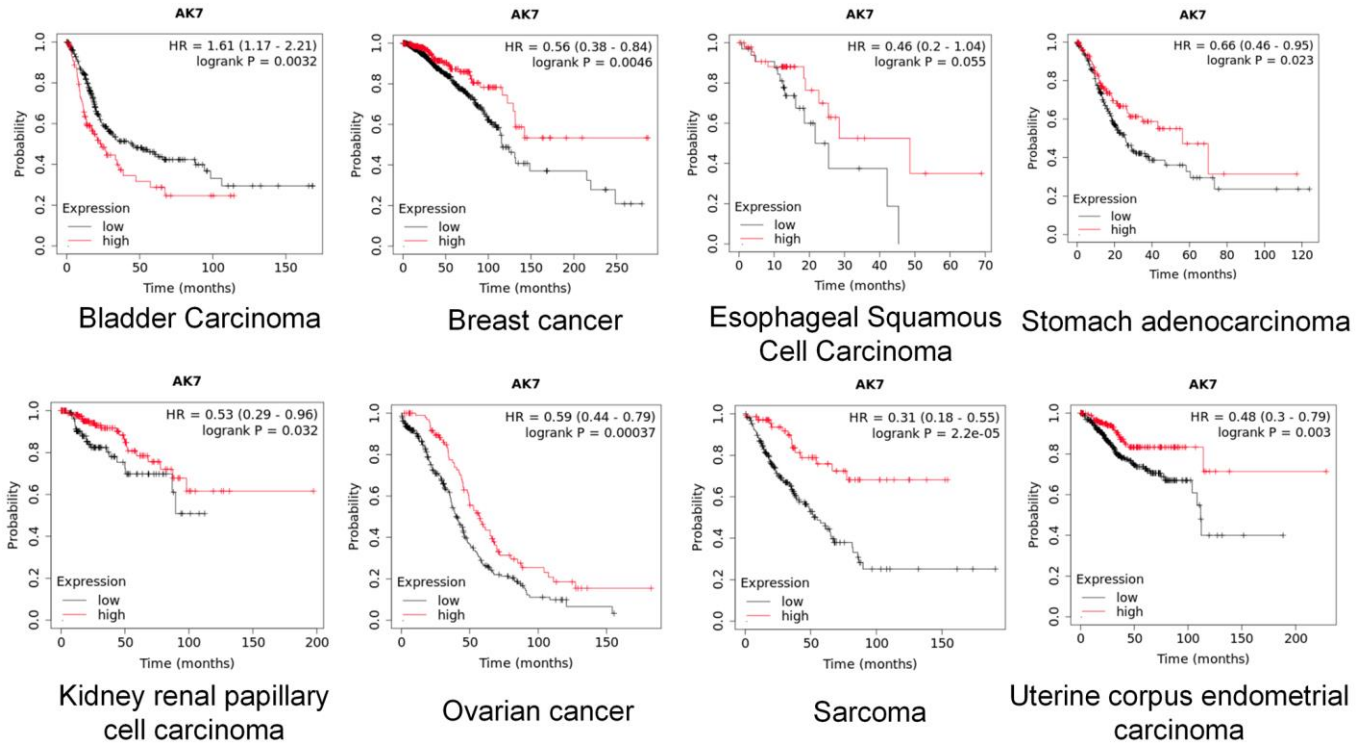

**Supplementary Figure 1. Relationship between AK and prognosis in different cancer species.**

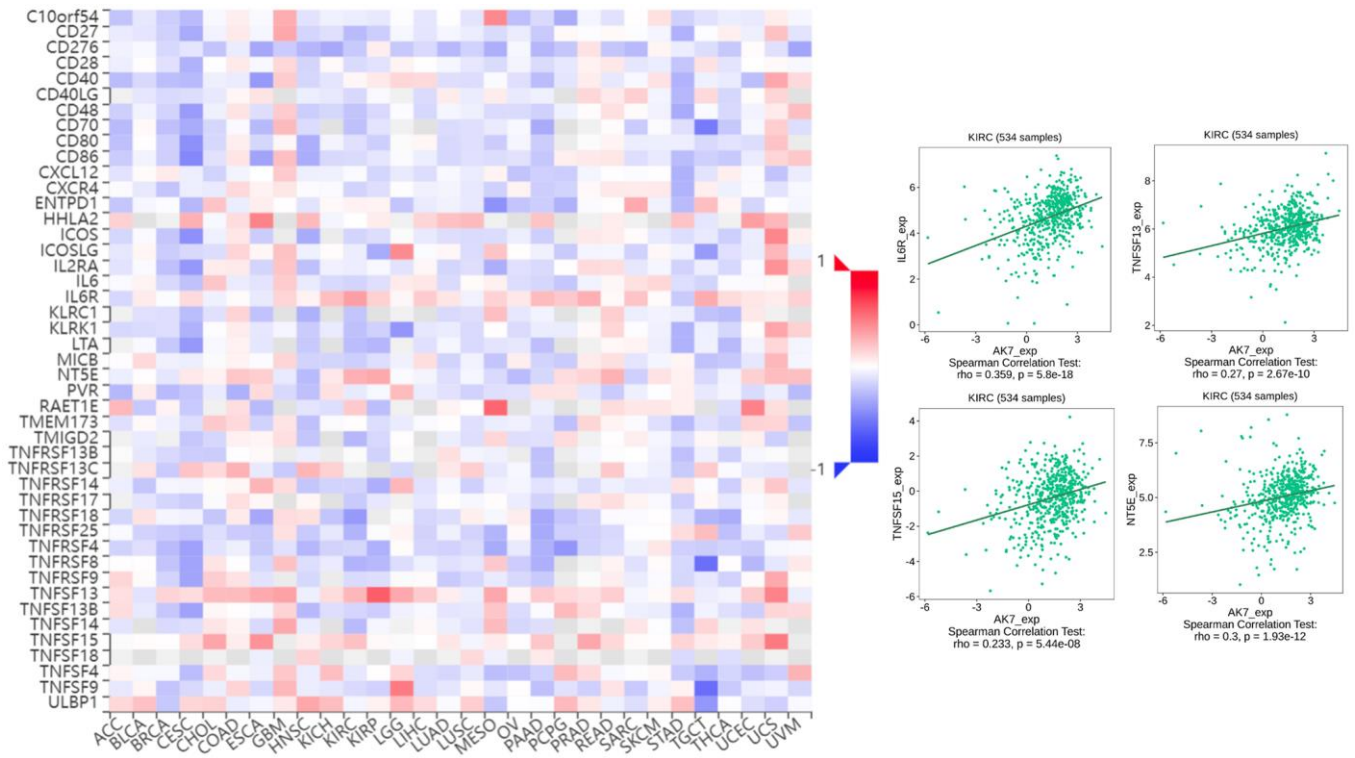

Supplementary Figure 2. Spearman correlations between of AK7 and immunostimulators across human cancers.

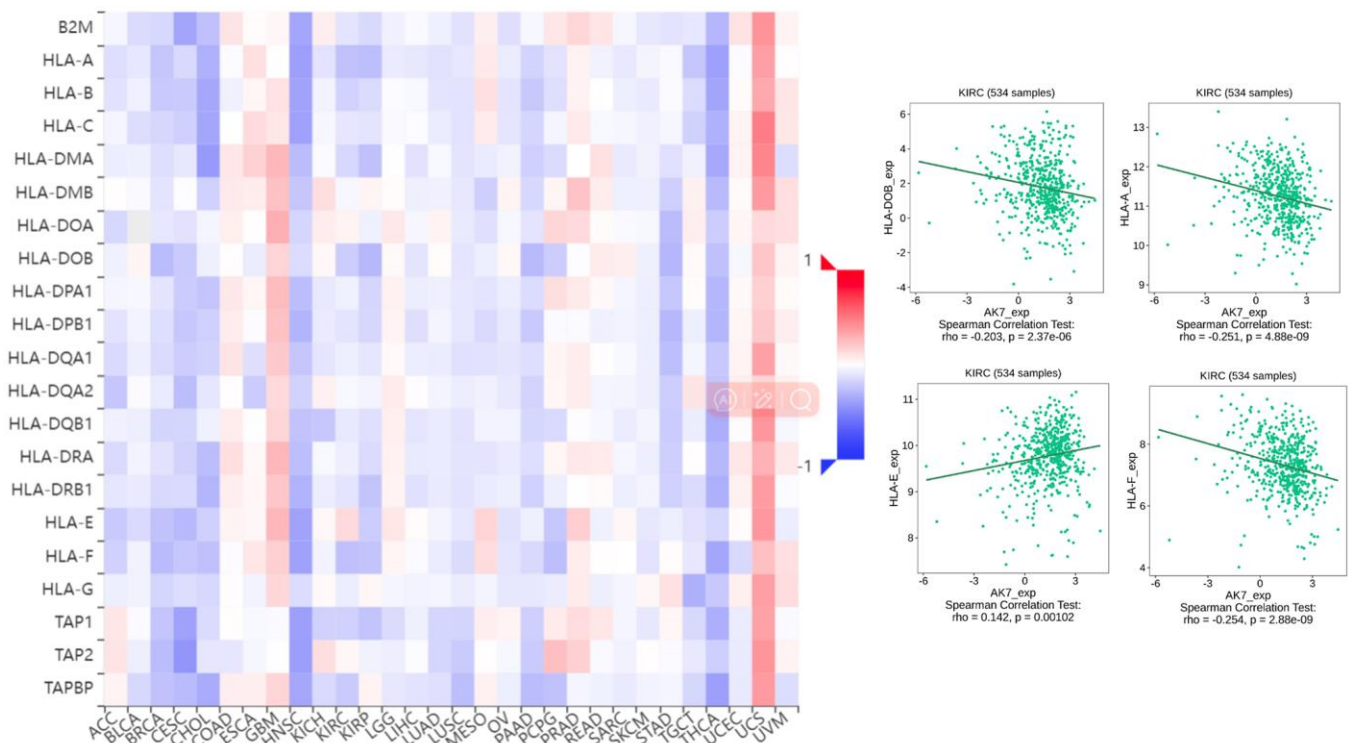

Supplementary Figure 3. Spearman correlations between AK7 and MHCs across human cancers.

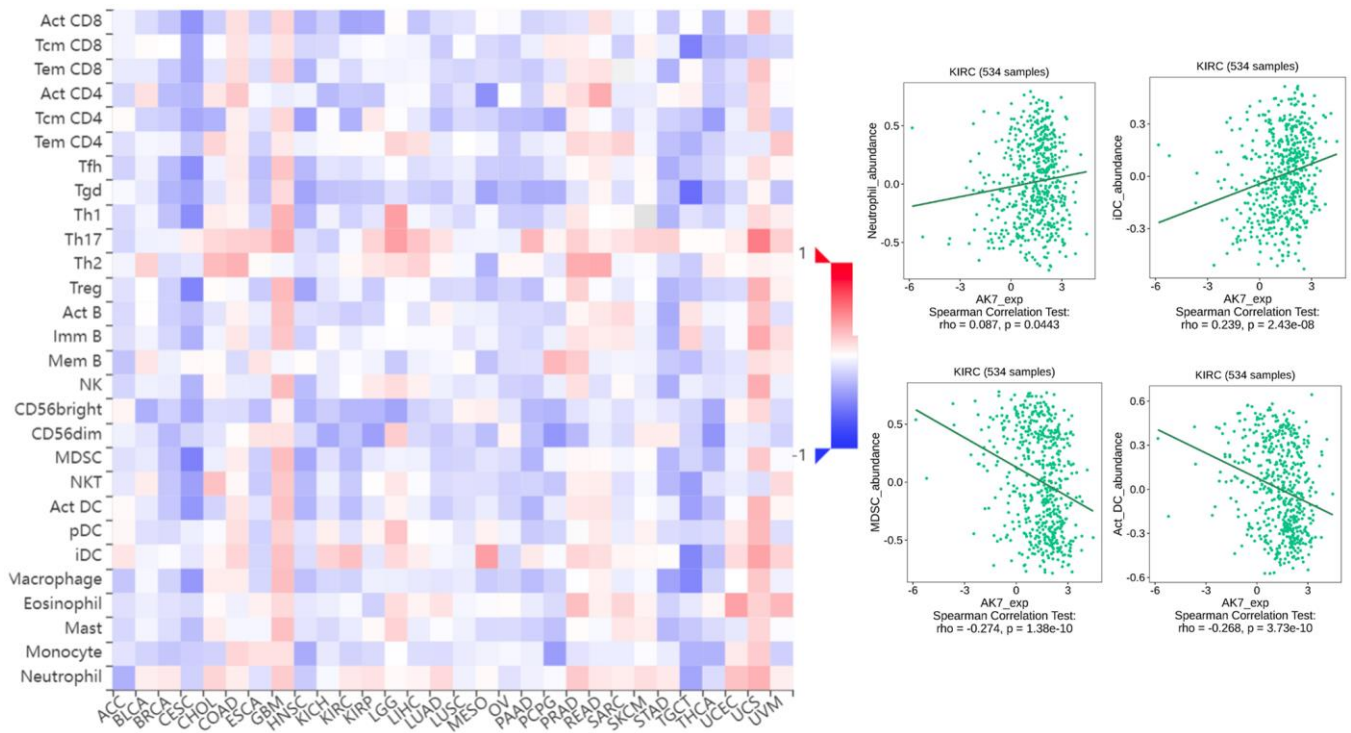

Supplementary Figure 4. Spearman correlations between AK7 and TILs across human cancers.
